# Supplementary material for: An ab initio parameterized interatomic force field for hydroxyapatite
Source: Royal Society of Chemistry journal article supplement (doi:10.1039/b617858h), 2007-01-01
Supplement: b617858h.pdf [file b617858h.pdf]

## Supplementary material

### An *ab initio* parameterized interatomic force field for hydroxyapatite.

Alfonso Pedone,<sup>a</sup> Marta Corno,<sup>b</sup> Bartolomeo Civalleri,<sup>b</sup> Gianluca Malavasi,<sup>a</sup> M. Cristina Menziani,<sup>a</sup>  
Ulderico Segre<sup>a</sup> and Piero Ugliengo<sup>\*b</sup>

5

#### 1) GULP input of the optimization and phonon calculation for hexagonal P6<sub>3</sub> HA

```
#
# Keywords:
#
10 opti conp compare phon angle nono
#
# Options:
#
title
15 hexagonal HA - optimization
end
name HA
cell
  9.328617  9.328617  6.949405  90.000000  90.000000 120.000000
20 fractional
Ca1 core 1/3      2/3      0.9975439 2.0000000 1.00000 0.00000
Ca1 core 2/3      1/3      0.0002482 2.0000000 1.00000 0.00000
Ca2 core 0.2443840 0.9899708 0.2492715 2.0000000 1.00000 0.00000
P1 core 0.3942981 0.3658030 0.2505560 5.0000000 1.00000 0.00000
25 O1 core 0.3178804 0.4802150 0.2531038 1.5609290 1.00000 0.00000
O1 core 0.5864274 0.4658338 0.2430649 1.5609290 1.00000 0.00000
O1 core 0.3326459 0.2498868 0.0736627 1.5609290 1.00000 0.00000
O1 core 0.6517670 0.7433956 0.9324463 1.5609290 1.00000 0.00000
O2 core 0.0000000 0.0000000 0.7906321 0.4941546 1.00000 0.00000
30 H1 core 0.0000000 0.0000000 0.9302591 1.0000000 1.00000 0.00000
O1 shel 0.3178804 0.4802150 0.2531038 -3.5609290 1.00000 0.00000
O1 shel 0.5864274 0.4658338 0.2430649 -3.5609290 1.00000 0.00000
O1 shel 0.3326459 0.2498868 0.0736627 -3.5609290 1.00000 0.00000
O1 shel 0.6517670 0.7433956 0.9324463 -3.5609290 1.00000 0.00000
35 O2 shel 0.0000000 0.0000000 0.7906321 -2.4941546 1.00000 0.00000
space
173
species 7
P core 5.000000
40 Ca core 2.000000
H core 1.000000
O1 core 1.560929
O1 shel -3.560929
O2 core 0.494155
45 O2 shel -2.494155
spring
O1 145.770418 0
spring
O2 43.887532 0
50 buck
P1 core O1 shel 1099.278765 0.342928 0.0000000 0.00 15.00 0 0 0
buck
Ca1 core O1 shel 3074.425319 0.288162 0.0000000 0.00 15.00 0 0 0
buck
55 Ca2 core O1 shel 2899.545766 0.288626 0.0000000 0.00 15.00 0 0 0
buck
Ca2 core O2 shel 948.04598 0.344000 0.0000000 0.00 15.00 0 0 0
buck
H1 core O2 shel 463.27569 0.205814 0.0000000 0.00 15.00 0 0 0
60 buck
O1 shel O1 shel 122152.69 0.15291 35.8699 0.00 15.00 0 0 0
buck
O1 shel O2 shel 846.47487 0.213327 0.090075 0.00 15.00 0 0 0
buck
65 O2 shel O2 shel 54718.655 0.253276 62.6727 0.00 15.00 0 0 0
```

70

75

2) CRYSTAL06 input for the frequency calculation of hexagonal P6<sub>3</sub> HA and list of all the computed frequencies

```
HAP
CRYSTAL
80 0 0 0
173
9.32861726 6.94940471
10
220 3.333333333333333E-01 -3.333333333333333E-01 -2.456023551711E-03
85 220 -3.333333333333333E-01 3.333333333333333E-01 2.482241275054E-04
220 2.443840782128E-01 -1.002912506776E-02 2.492715740572E-01
15 3.942981565720E-01 3.658030983991E-01 2.505560288223E-01
8 3.178804981007E-01 4.802150573665E-01 2.531038069180E-01
8 -4.135725529085E-01 4.658338011070E-01 2.430649979592E-01
90 8 3.326459275406E-01 2.498868133568E-01 7.366270117730E-02
8 -3.482329741991E-01 -2.566043560930E-01 -6.755362047962E-02
8 0.000000000000E+00 0.000000000000E+00 -2.093678348920E-01
1 0.000000000000E+00 0.000000000000E+00 -6.974083104290E-02
FREQCALC
95 INTENS
END
END
220 2
HAYWSC
100 0 1 3 8. 1.
5.3568 -1.4687 -0.0794
1.71 -1.8752 0.2902
1.0 3.4301 0.1427
0 1 1 2. 1.
105 0.500 1.0 1.0
8 4
0 0 6 2. 1.
5484.6717 0.0018
825.2349 0.0140
110 188.0470 0.0684
52.9645 0.2327
16.8976 0.4702
5.7996 0.3585
0 1 3 6. 1.
115 15.5396 -0.1108 0.0709
3.5999 -0.1480 0.3398
1.0138 1.1308 0.7272
0 1 1 0. 1.
0.2742 1. 1.
120 0 3 1 0. 1.
0.538 1.
15 5
0 0 8 2. 1.
202703. 0.0001
125 22413.1 0.0013
4625.08 0.0068
1312.41 0.0275
425.149 0.0951
146.409 0.2667
130 51.8363 0.4781
18.5913 0.2971
0 1 5 8. 1.
339.375 0.00089 0.00287
94.9248 -0.03549 0.02778
135 23.125 -0.153 0.172
6.9753 0.355 0.4215
2.275 0.9102 0.4109
0 1 2 5. 1.
```

140 1.219 -0.3715 0.09158  
 0.48105 1.271 0.9349  
 0 1 1 0. 1.  
 0.135 1. 1.  
 0 3 1 0. 1.  
 0.74583 1.

145 1 3  
 0 0 3 1. 1.00  
 0.1873113696D+02 0.3349460434D-01  
 0.2825394365D+01 0.2347269535D+00  
 0.6401216923D+00 0.8137573262D+00

150 0 0 1 0. 1.00  
 0.1612777588D+00 0.1000000000D+01  
 0 2 1 0. 1.  
 1.1 1.

99 0  
 155 END  
 DFT  
 B3LYP  
 XLGRID  
 END

160 TOLINTEG  
 6 6 6 6 14  
 SHRINK  
 4 4  
 LEVSHIFT

165 6 1  
 FMIXING  
 30  
 END

170

175

### 3) CRYSTAL06 output harmonic frequencies for HA

|     | MODES  | EIGV<br>(HARTREE**2) | FREQUENCIES<br>(CM**-1) | IRREP   | IR    | INTENS<br>(KM/MOL) | RAMAN |
|-----|--------|----------------------|-------------------------|---------|-------|--------------------|-------|
| 180 | 1- 2   | -0.6891E-08          | -18.2186                | -0.5462 | (E1 ) | A ( 86.15)         | A     |
|     | 3- 3   | -0.2252E-10          | -1.0415                 | -0.0312 | (A )  | A ( 0.00)          | A     |
|     | 4- 5   | 0.3643E-10           | 1.3246                  | 0.0397  | (E1 ) | A ( 0.76)          | A     |
| 185 | 6- 6   | 0.1497E-06           | 84.9096                 | 2.5455  | (B )  | I ( 0.00)          | I     |
|     | 7- 8   | 0.2313E-06           | 105.5502                | 3.1643  | (E2 ) | I ( 0.00)          | A     |
|     | 9- 9   | 0.2795E-06           | 116.0237                | 3.4783  | (A )  | A ( 43.90)         | A     |
|     | 10- 11 | 0.3184E-06           | 123.8504                | 3.7129  | (E1 ) | A ( 324.07)        | A     |
|     | 12- 13 | 0.4147E-06           | 141.3323                | 4.2370  | (E2 ) | I ( 0.00)          | A     |
| 190 | 14- 15 | 0.5544E-06           | 163.4160                | 4.8991  | (E1 ) | A ( 15.76)         | A     |
|     | 16- 17 | 0.5762E-06           | 166.5981                | 4.9945  | (E2 ) | I ( 0.00)          | A     |
|     | 18- 19 | 0.6097E-06           | 171.3765                | 5.1377  | (E2 ) | I ( 0.00)          | A     |
|     | 20- 20 | 0.6746E-06           | 180.2670                | 5.4043  | (B )  | I ( 0.00)          | I     |
|     | 21- 21 | 0.7320E-06           | 187.7716                | 5.6293  | (A )  | A ( 0.27)          | A     |
| 195 | 22- 22 | 0.7596E-06           | 191.2886                | 5.7347  | (B )  | I ( 0.00)          | I     |
|     | 23- 23 | 0.8611E-06           | 203.6653                | 6.1057  | (A )  | A ( 21.28)         | A     |
|     | 24- 25 | 0.9355E-06           | 212.2772                | 6.3639  | (E2 ) | I ( 0.00)          | A     |
|     | 26- 26 | 0.9721E-06           | 216.3921                | 6.4873  | (B )  | I ( 0.00)          | I     |
| 200 | 27- 28 | 0.1004E-05           | 219.9102                | 6.5927  | (E1 ) | A ( 176.33)        | A     |
|     | 29- 29 | 0.1076E-05           | 227.6210                | 6.8239  | (A )  | A ( 10.13)         | A     |
|     | 30- 30 | 0.1117E-05           | 231.9479                | 6.9536  | (B )  | I ( 0.00)          | I     |
|     | 31- 31 | 0.1186E-05           | 239.0424                | 7.1663  | (A )  | A ( 93.77)         | A     |
|     | 32- 33 | 0.1253E-05           | 245.6269                | 7.3637  | (E1 ) | A ( 1335.36)       | A     |
|     | 34- 35 | 0.1279E-05           | 248.1678                | 7.4399  | (E2 ) | I ( 0.00)          | A     |
| 205 | 36- 37 | 0.1326E-05           | 252.7537                | 7.5774  | (E1 ) | A ( 734.38)        | A     |
|     | 38- 38 | 0.1366E-05           | 256.5527                | 7.6913  | (A )  | A ( 0.06)          | A     |
|     | 39- 39 | 0.1366E-05           | 256.5550                | 7.6913  | (B )  | I ( 0.00)          | I     |
|     | 40- 41 | 0.1453E-05           | 264.5150                | 7.9300  | (E2 ) | I ( 0.00)          | A     |
|     | 42- 42 | 0.1582E-05           | 276.0804                | 8.2767  | (B )  | I ( 0.00)          | I     |
|     | 43- 44 | 0.1602E-05           | 277.7539                | 8.3269  | (E2 ) | I ( 0.00)          | A     |
| 210 | 45- 46 | 0.1605E-05           | 278.0478                | 8.3357  | (E1 ) | A ( 161.80)        | A     |
|     | 47- 47 | 0.1754E-05           | 290.6813                | 8.7144  | (B )  | I ( 0.00)          | I     |
|     | 48- 49 | 0.1764E-05           | 291.4758                | 8.7382  | (E1 ) | A ( 149.91)        | A     |

Supplementary Material (ESI) for Journal of Materials Chemistry  
 This journal is © The Royal Society of Chemistry 2007

|     |      |     |            |           |          |       |     |          |   |
|-----|------|-----|------------|-----------|----------|-------|-----|----------|---|
|     | 50-  | 50  | 0.1840E-05 | 297.7122  | 8.9252   | (A )  | A ( | 7.31)    | A |
| 215 | 51-  | 52  | 0.1864E-05 | 299.6079  | 8.9820   | (E2 ) | I ( | 0.00)    | A |
|     | 53-  | 53  | 0.2127E-05 | 320.1216  | 9.5970   | (A )  | A ( | 98.15)   | A |
|     | 54-  | 54  | 0.2140E-05 | 321.0777  | 9.6257   | (B )  | I ( | 0.00)    | I |
|     | 55-  | 56  | 0.2224E-05 | 327.3309  | 9.8131   | (E2 ) | I ( | 0.00)    | A |
|     | 57-  | 57  | 0.2277E-05 | 331.1478  | 9.9276   | (B )  | I ( | 0.00)    | I |
| 220 | 58-  | 58  | 0.2298E-05 | 332.7251  | 9.9748   | (A )  | A ( | 712.28)  | A |
|     | 59-  | 60  | 0.2403E-05 | 340.2444  | 10.2003  | (E1 ) | A ( | 724.74)  | A |
|     | 61-  | 62  | 0.2647E-05 | 357.0686  | 10.7046  | (E2 ) | I ( | 0.00)    | A |
|     | 63-  | 63  | 0.2738E-05 | 363.1366  | 10.8866  | (A )  | A ( | 322.89)  | A |
|     | 64-  | 64  | 0.2765E-05 | 364.9325  | 10.9404  | (B )  | I ( | 0.00)    | I |
| 225 | 65-  | 66  | 0.2976E-05 | 378.6346  | 11.3512  | (E1 ) | A ( | 4.85)    | A |
|     | 67-  | 67  | 0.2993E-05 | 379.7077  | 11.3833  | (B )  | I ( | 0.00)    | I |
|     | 68-  | 68  | 0.3032E-05 | 382.1348  | 11.4561  | (A )  | A ( | 166.73)  | A |
|     | 69-  | 70  | 0.4236E-05 | 451.7217  | 13.5423  | (E2 ) | I ( | 0.00)    | A |
|     | 71-  | 72  | 0.4375E-05 | 459.0882  | 13.7631  | (E1 ) | A ( | 680.39)  | A |
| 230 | 73-  | 74  | 0.4704E-05 | 476.0044  | 14.2703  | (E1 ) | A ( | 63.36)   | A |
|     | 75-  | 75  | 0.4720E-05 | 476.8136  | 14.2945  | (B )  | I ( | 0.00)    | I |
|     | 76-  | 77  | 0.4821E-05 | 481.8769  | 14.4463  | (E2 ) | I ( | 0.00)    | A |
|     | 78-  | 79  | 0.5185E-05 | 499.7769  | 14.9829  | (E2 ) | I ( | 0.00)    | A |
|     | 80-  | 80  | 0.5322E-05 | 506.3356  | 15.1796  | (A )  | A ( | 0.30)    | A |
| 235 | 81-  | 82  | 0.5500E-05 | 514.6947  | 15.4302  | (E1 ) | A ( | 118.44)  | A |
|     | 83-  | 83  | 0.5770E-05 | 527.2145  | 15.8055  | (A )  | A ( | 6.52)    | A |
|     | 84-  | 84  | 0.5889E-05 | 532.5949  | 15.9668  | (B )  | I ( | 0.00)    | I |
|     | 85-  | 86  | 0.7262E-05 | 591.4310  | 17.7307  | (E2 ) | I ( | 0.00)    | A |
|     | 87-  | 87  | 0.7440E-05 | 598.6576  | 17.9473  | (A )  | A ( | 1037.58) | A |
| 240 | 88-  | 89  | 0.7525E-05 | 602.0561  | 18.0492  | (E1 ) | A ( | 537.95)  | A |
|     | 90-  | 90  | 0.7913E-05 | 617.4028  | 18.5093  | (B )  | I ( | 0.00)    | I |
|     | 91-  | 92  | 0.8018E-05 | 621.4682  | 18.6311  | (E2 ) | I ( | 0.00)    | A |
|     | 93-  | 93  | 0.8245E-05 | 630.2146  | 18.8934  | (A )  | A ( | 0.13)    | A |
|     | 94-  | 95  | 0.8279E-05 | 631.4860  | 18.9315  | (E1 ) | A ( | 416.12)  | A |
| 245 | 96-  | 97  | 0.8474E-05 | 638.8898  | 19.1534  | (E1 ) | A ( | 424.90)  | A |
|     | 98-  | 98  | 0.8665E-05 | 646.0396  | 19.3678  | (B )  | I ( | 0.00)    | I |
|     | 99-  | 99  | 0.8934E-05 | 656.0048  | 19.6665  | (A )  | A ( | 6.92)    | A |
|     | 100- | 101 | 0.9138E-05 | 663.4556  | 19.8899  | (E2 ) | I ( | 0.00)    | A |
|     | 102- | 102 | 0.9182E-05 | 665.0353  | 19.9373  | (B )  | I ( | 0.00)    | I |
| 250 | 103- | 104 | 0.9645E-05 | 681.6241  | 20.4346  | (E1 ) | A ( | 1131.78) | A |
|     | 105- | 106 | 0.1193E-04 | 758.2114  | 22.7306  | (E2 ) | I ( | 0.00)    | A |
|     | 107- | 108 | 0.2036E-04 | 990.2697  | 29.6875  | (E1 ) | A ( | 348.27)  | A |
|     | 109- | 109 | 0.2040E-04 | 991.3654  | 29.7204  | (A )  | A ( | 6.00)    | A |
|     | 110- | 110 | 0.2041E-04 | 991.4459  | 29.7228  | (B )  | I ( | 0.00)    | I |
| 255 | 111- | 112 | 0.2046E-04 | 992.6623  | 29.7593  | (E2 ) | I ( | 0.00)    | A |
|     | 113- | 114 | 0.2420E-04 | 1079.6719 | 32.3677  | (E1 ) | A ( | 6409.39) | A |
|     | 115- | 116 | 0.2423E-04 | 1080.4482 | 32.3910  | (E2 ) | I ( | 0.00)    | A |
|     | 117- | 117 | 0.2456E-04 | 1087.7424 | 32.6097  | (A )  | A ( | 3934.05) | A |
|     | 118- | 118 | 0.2514E-04 | 1100.3527 | 32.9877  | (B )  | I ( | 0.00)    | I |
| 260 | 119- | 120 | 0.2544E-04 | 1106.9987 | 33.1870  | (E1 ) | A ( | 155.63)  | A |
|     | 121- | 122 | 0.2553E-04 | 1108.8778 | 33.2433  | (E2 ) | I ( | 0.00)    | A |
|     | 123- | 123 | 0.2562E-04 | 1110.8551 | 33.3026  | (A )  | A ( | 12.06)   | A |
|     | 124- | 125 | 0.2634E-04 | 1126.3146 | 33.7661  | (E2 ) | I ( | 0.00)    | A |
|     | 126- | 126 | 0.2636E-04 | 1126.7719 | 33.7798  | (A )  | A ( | 11.26)   | A |
| 265 | 127- | 128 | 0.2725E-04 | 1145.6851 | 34.3468  | (E1 ) | A ( | 427.91)  | A |
|     | 129- | 129 | 0.2753E-04 | 1151.6122 | 34.5245  | (B )  | I ( | 0.00)    | I |
|     | 130- | 130 | 0.2888E-04 | 1179.5148 | 35.3610  | (B )  | I ( | 0.00)    | I |
|     | 131- | 131 | 0.2954E-03 | 3772.2259 | 113.0885 | (B )  | I ( | 0.00)    | I |
|     | 132- | 132 | 0.2958E-03 | 3774.4061 | 113.1538 | (A )  | A ( | 38.23)   | A |

270 4) CRYSTAL06 input for the optimization of  $\alpha$ -tricalciumphosphate (B3LYP)

```

ALFA TRICALCIUMPHOSPHATE
CRYSTAL
1 0 0
275 P 1 21/A
12.72673300000 27.52860200000 15.30374400000 126.858908
78
220 0.389320000000 0.027540000000 0.082380000000
220 0.155700000000 0.046000000000 0.331750000000
280 220 0.103940000000 0.074890000000 0.056080000000
220 0.121520000000 0.094360000000 0.552830000000
220 0.111070000000 0.080550000000 0.799980000000
220 0.356570000000 0.140450000000 0.318130000000
220 0.110680000000 0.194210000000 0.917620000000
    
```

|     |     |                |                |                |
|-----|-----|----------------|----------------|----------------|
| 285 | 220 | 0.344300000000 | 0.212660000000 | 0.668250000000 |
|     | 220 | 0.396060000000 | 0.241560000000 | 0.943920000000 |
|     | 220 | 0.378480000000 | 0.261030000000 | 0.447170000000 |
|     | 220 | 0.388930000000 | 0.247220000000 | 0.200020000000 |
| 290 | 220 | 0.143430000000 | 0.307110000000 | 0.681870000000 |
|     | 220 | 0.389320000000 | 0.360870000000 | 0.082380000000 |
|     | 220 | 0.155700000000 | 0.379330000000 | 0.331750000000 |
|     | 220 | 0.103940000000 | 0.408220000000 | 0.056080000000 |
|     | 220 | 0.121520000000 | 0.427690000000 | 0.552830000000 |
|     | 220 | 0.111070000000 | 0.413890000000 | 0.799980000000 |
| 295 | 220 | 0.356570000000 | 0.473780000000 | 0.318130000000 |
|     | 15  | 0.380480000000 | 0.140830000000 | 0.100450000000 |
|     | 15  | 0.378910000000 | 0.132640000000 | 0.544350000000 |
|     | 15  | 0.115050000000 | 0.196570000000 | 0.696290000000 |
|     | 15  | 0.124650000000 | 0.205700000000 | 0.155340000000 |
| 300 | 15  | 0.119520000000 | 0.307500000000 | 0.899550000000 |
|     | 15  | 0.121090000000 | 0.299310000000 | 0.455650000000 |
|     | 15  | 0.384950000000 | 0.363230000000 | 0.303710000000 |
|     | 15  | 0.375350000000 | 0.372370000000 | 0.844660000000 |
|     | 15  | 0.380480000000 | 0.474170000000 | 0.100450000000 |
| 305 | 15  | 0.378910000000 | 0.465970000000 | 0.544350000000 |
|     | 15  | 0.115050000000 | 0.529900000000 | 0.696290000000 |
|     | 15  | 0.124650000000 | 0.539040000000 | 0.155340000000 |
|     | 8   | 0.260240000000 | 0.107140000000 | 0.041110000000 |
|     | 8   | 0.347510000000 | 0.185360000000 | 0.027040000000 |
| 310 | 8   | 0.500890000000 | 0.109160000000 | 0.133790000000 |
|     | 8   | 0.421320000000 | 0.161580000000 | 0.211770000000 |
|     | 8   | 0.314710000000 | 0.126700000000 | 0.601830000000 |
|     | 8   | 0.305380000000 | 0.109670000000 | 0.430770000000 |
|     | 8   | 0.398770000000 | 0.188920000000 | 0.540190000000 |
| 315 | 8   | 0.522160000000 | 0.111680000000 | 0.618550000000 |
|     | 8   | 0.999700000000 | 0.233380000000 | 0.640880000000 |
|     | 8   | 0.120280000000 | 0.169240000000 | 0.612980000000 |
|     | 8   | 0.243400000000 | 0.229850000000 | 0.760110000000 |
|     | 8   | 0.116140000000 | 0.164340000000 | 0.779480000000 |
| 320 | 8   | 0.988590000000 | 0.221810000000 | 0.124310000000 |
|     | 8   | 0.118860000000 | 0.148940000000 | 0.150370000000 |
|     | 8   | 0.134250000000 | 0.228130000000 | 0.066920000000 |
|     | 8   | 0.248920000000 | 0.220420000000 | 0.266220000000 |
|     | 8   | 0.239760000000 | 0.273810000000 | 0.958890000000 |
| 325 | 8   | 0.152490000000 | 0.352020000000 | 0.972960000000 |
|     | 8   | 0.999110000000 | 0.275830000000 | 0.866210000000 |
|     | 8   | 0.078680000000 | 0.328240000000 | 0.788230000000 |
|     | 8   | 0.194620000000 | 0.276340000000 | 0.569230000000 |
|     | 8   | 0.185290000000 | 0.293360000000 | 0.398170000000 |
| 330 | 8   | 0.101230000000 | 0.355580000000 | 0.459810000000 |
|     | 8   | 0.977840000000 | 0.278340000000 | 0.381450000000 |
|     | 8   | 0.500300000000 | 0.400050000000 | 0.359120000000 |
|     | 8   | 0.379720000000 | 0.335910000000 | 0.387020000000 |
|     | 8   | 0.256600000000 | 0.396520000000 | 0.239890000000 |
| 335 | 8   | 0.383860000000 | 0.331010000000 | 0.220520000000 |
|     | 8   | 0.511410000000 | 0.388470000000 | 0.875690000000 |
|     | 8   | 0.381140000000 | 0.315600000000 | 0.849630000000 |
|     | 8   | 0.365750000000 | 0.394790000000 | 0.933080000000 |
|     | 8   | 0.251080000000 | 0.387080000000 | 0.733780000000 |
| 340 | 8   | 0.260240000000 | 0.440470000000 | 0.041110000000 |
|     | 8   | 0.347510000000 | 0.518690000000 | 0.027040000000 |
|     | 8   | 0.500890000000 | 0.442490000000 | 0.133790000000 |
|     | 8   | 0.421320000000 | 0.494910000000 | 0.211770000000 |
|     | 8   | 0.314710000000 | 0.460030000000 | 0.601830000000 |
| 345 | 8   | 0.305380000000 | 0.443000000000 | 0.430770000000 |
|     | 8   | 0.398770000000 | 0.522250000000 | 0.540190000000 |
|     | 8   | 0.522160000000 | 0.445010000000 | 0.618550000000 |
|     | 8   | 0.999700000000 | 0.566720000000 | 0.640880000000 |
|     | 8   | 0.120280000000 | 0.502570000000 | 0.612980000000 |
| 350 | 8   | 0.243400000000 | 0.563180000000 | 0.760110000000 |
|     | 8   | 0.116140000000 | 0.497670000000 | 0.779480000000 |
|     | 8   | 0.988590000000 | 0.555140000000 | 0.124310000000 |
|     | 8   | 0.118860000000 | 0.482270000000 | 0.150370000000 |
|     | 8   | 0.134250000000 | 0.561460000000 | 0.066920000000 |
| 355 | 8   | 0.248920000000 | 0.553750000000 | 0.266220000000 |

END

8 3

0 0 3 2.0 1.

```

360      0.3220370000D+03  0.5923939339D-01
      0.4843080000D+02  0.3514999608D+00
      0.1042060000D+02  0.7076579210D+00
    0 1 2 6.0 1.
      0.7402940000D+01 -0.4044535832D+00  0.2445861070D+00
      0.1576200000D+01  0.1221561761D+01  0.8539553735D+00
365 0 1 1 0.0 1.
      0.3736840000D+00  0.1000000000D+01  0.1000000000D+01
    220 2
    HAYWSC
    0 1 3 8. 1.
370 5.3568 -1.4687 -0.0794
      1.71 -1.8752 0.2902
      1.0 3.4301 0.1427
    0 1 1 2. 1.
      0.500 1.0 1.0
375 15 5
    0 0 3 2.0 1.
      0.1054900000D+04  0.6554071355D-01
      0.1591950000D+03  0.3840360794D+00
      0.3453040000D+02  0.6745411394D+00
380 0 1 3 8.0 1.
      0.4428660000D+02 -0.1021300535D+00  0.1108510025D+00
      0.1010190000D+02  0.8159224271D-01  0.4564950104D+00
      0.2739970000D+01  0.9697885076D+00  0.6069360139D+00
    0 1 2 5.0 1.
385 0.1218650000D+01 -0.3714960219D+00  0.9158231022D-01
      0.3955460000D+00  0.1270993496D+01  0.9349241043D+00
    0 1 1 0.0 1.
      0.1228110000D+00  0.1000000000D+01  0.1000000000D+01
    0 3 1 0.0 1.
390 0.5500000000D+00  0.1000000000D+01
    99 0
    END
    DFT
    B3LYP
395 XLGRID
    END
    SCFDIR
    TOLINTEG
    6 6 6 6 14
400 SHRINK
    1 1
    LEVSHIFT
    6 1
    FMIXING
405 30
    END
    
```

### 5) CRYSTAL06 input for the optimization of $\beta$ -tricalciumphosphate (B3LYP)

```

410 BETA TRICALCIUMPHOSPHATE
    CRYSTAL
    0 0 0
    1
    10.28437400000  10.28440300000  38.61338100000  90.000917  89.999955  120.000372
415 273
      220 0.727720000000  0.860750000000  0.168650000000
      220 0.620370000000  0.815580000000  0.968330000000
      220 0.739980000000  0.861570000000  0.062310000000
      220 0.002300000000  0.001370000000  0.737060000000
420 15 0.002290000000  0.001360000000  0.002780000000
      15 0.689810000000  0.853710000000  0.870410000000
      15 0.653960000000  0.842720000000  0.770240000000
      8 0.727550000000  0.885680000000  0.908400000000
      8 0.751520000000  0.755910000000  0.855460000000
425 8 0.736490000000  0.007530000000  0.852000000000
      8 0.515170000000  0.759490000000  0.862150000000
      8 0.600630000000  0.951110000000  0.782910000000
      8 0.578540000000  0.684610000000  0.785530000000
      8 0.083490000000  0.906150000000  0.779210000000
430 8 0.624300000000  0.825220000000  0.730490000000
    
```

Supplementary Material (ESI) for Journal of Materials Chemistry  
This journal is © The Royal Society of Chemistry 2007

|     |     |                |                |                |
|-----|-----|----------------|----------------|----------------|
|     | 8   | 0.008070000000 | 0.859940000000 | 0.991330000000 |
|     | 8   | 0.002290000000 | 0.001360000000 | 0.043190000000 |
|     | 220 | 0.142890000000 | 0.867400000000 | 0.168650000000 |
|     | 220 | 0.188080000000 | 0.805230000000 | 0.968330000000 |
| 435 | 220 | 0.142090000000 | 0.878840000000 | 0.062310000000 |
|     | 15  | 0.149900000000 | 0.836500000000 | 0.870410000000 |
|     | 15  | 0.160930000000 | 0.811670000000 | 0.770240000000 |
|     | 8   | 0.117940000000 | 0.842250000000 | 0.908400000000 |
| 440 | 8   | 0.247670000000 | 0.996010000000 | 0.855470000000 |
|     | 8   | 0.996090000000 | 0.729330000000 | 0.852000000000 |
|     | 8   | 0.244140000000 | 0.756090000000 | 0.862150000000 |
|     | 8   | 0.052520000000 | 0.649940000000 | 0.782900000000 |
|     | 8   | 0.319030000000 | 0.894350000000 | 0.785540000000 |
| 445 | 8   | 0.097500000000 | 0.177780000000 | 0.779200000000 |
|     | 8   | 0.178450000000 | 0.799530000000 | 0.730490000000 |
|     | 8   | 0.143700000000 | 0.148560000000 | 0.991330000000 |
|     | 220 | 0.136250000000 | 0.275920000000 | 0.168650000000 |
|     | 220 | 0.198430000000 | 0.383280000000 | 0.968340000000 |
| 450 | 220 | 0.124820000000 | 0.263690000000 | 0.062310000000 |
|     | 15  | 0.167130000000 | 0.313840000000 | 0.870400000000 |
|     | 15  | 0.191980000000 | 0.349700000000 | 0.770230000000 |
|     | 8   | 0.161340000000 | 0.276110000000 | 0.908400000000 |
|     | 8   | 0.007620000000 | 0.252110000000 | 0.855460000000 |
| 455 | 8   | 0.274290000000 | 0.267180000000 | 0.852000000000 |
|     | 8   | 0.247550000000 | 0.488480000000 | 0.862150000000 |
|     | 8   | 0.353700000000 | 0.403040000000 | 0.782900000000 |
|     | 8   | 0.109290000000 | 0.425120000000 | 0.785530000000 |
|     | 8   | 0.825880000000 | 0.920170000000 | 0.779210000000 |
| 460 | 8   | 0.204120000000 | 0.379360000000 | 0.730490000000 |
|     | 8   | 0.855080000000 | 0.995570000000 | 0.991330000000 |
|     | 220 | 0.135800000000 | 0.861260000000 | 0.670600000000 |
|     | 220 | 0.205170000000 | 0.819990000000 | 0.470450000000 |
|     | 220 | 0.150840000000 | 0.844100000000 | 0.567210000000 |
| 465 | 220 | 0.002290000000 | 0.001380000000 | 0.424590000000 |
|     | 220 | 0.002280000000 | 0.001350000000 | 0.236430000000 |
|     | 15  | 0.002300000000 | 0.001390000000 | 0.499870000000 |
|     | 15  | 0.166720000000 | 0.868200000000 | 0.370630000000 |
|     | 15  | 0.186020000000 | 0.831850000000 | 0.270600000000 |
| 470 | 8   | 0.169080000000 | 0.920100000000 | 0.408860000000 |
|     | 8   | 0.007700000000 | 0.785850000000 | 0.357580000000 |
|     | 8   | 0.284740000000 | 0.013960000000 | 0.351320000000 |
|     | 8   | 0.237070000000 | 0.762170000000 | 0.365850000000 |
|     | 8   | 0.345250000000 | 0.935790000000 | 0.285720000000 |
| 475 | 8   | 0.090370000000 | 0.675600000000 | 0.287640000000 |
|     | 8   | 0.823050000000 | 0.907120000000 | 0.277860000000 |
|     | 8   | 0.204590000000 | 0.808530000000 | 0.232180000000 |
|     | 8   | 0.869230000000 | 0.856910000000 | 0.481800000000 |
|     | 8   | 0.002370000000 | 0.001490000000 | 0.537530000000 |
| 480 | 220 | 0.728680000000 | 0.867870000000 | 0.670600000000 |
|     | 220 | 0.618020000000 | 0.798470000000 | 0.470450000000 |
|     | 220 | 0.696490000000 | 0.852830000000 | 0.567210000000 |
|     | 15  | 0.704690000000 | 0.836930000000 | 0.370630000000 |
|     | 15  | 0.649040000000 | 0.817590000000 | 0.270600000000 |
| 485 | 8   | 0.754230000000 | 0.834560000000 | 0.408860000000 |
|     | 8   | 0.781380000000 | 0.995940000000 | 0.357590000000 |
|     | 8   | 0.732420000000 | 0.718900000000 | 0.351320000000 |
|     | 8   | 0.528320000000 | 0.766580000000 | 0.365850000000 |
|     | 8   | 0.593790000000 | 0.658380000000 | 0.285730000000 |
| 490 | 8   | 0.588410000000 | 0.913220000000 | 0.287640000000 |
|     | 8   | 0.087290000000 | 0.180610000000 | 0.277850000000 |
|     | 8   | 0.607170000000 | 0.799000000000 | 0.232180000000 |
|     | 8   | 0.990880000000 | 0.134410000000 | 0.481770000000 |
|     | 220 | 0.142380000000 | 0.274970000000 | 0.670600000000 |
| 495 | 220 | 0.183660000000 | 0.385630000000 | 0.470450000000 |
|     | 220 | 0.159510000000 | 0.307080000000 | 0.567200000000 |
|     | 15  | 0.135470000000 | 0.298980000000 | 0.370630000000 |
|     | 15  | 0.171790000000 | 0.354610000000 | 0.270600000000 |
| 500 | 8   | 0.083580000000 | 0.249440000000 | 0.408860000000 |
|     | 8   | 0.217840000000 | 0.222340000000 | 0.357580000000 |
|     | 8   | 0.989700000000 | 0.271220000000 | 0.351310000000 |
|     | 8   | 0.241480000000 | 0.475360000000 | 0.365840000000 |
|     | 8   | 0.067840000000 | 0.409880000000 | 0.285720000000 |
|     | 8   | 0.328050000000 | 0.415230000000 | 0.287640000000 |
|     | 8   | 0.096530000000 | 0.916360000000 | 0.277850000000 |

Supplementary Material (ESI) for Journal of Materials Chemistry  
This journal is © The Royal Society of Chemistry 2007

|     |     |                |                |                |
|-----|-----|----------------|----------------|----------------|
| 505 | 8   | 0.195090000000 | 0.396490000000 | 0.232180000000 |
|     | 8   | 0.146730000000 | 0.012760000000 | 0.481780000000 |
|     | 220 | 0.061050000000 | 0.527420000000 | 0.835320000000 |
|     | 220 | 0.953700000000 | 0.482250000000 | 0.635000000000 |
|     | 220 | 0.073310000000 | 0.528230000000 | 0.728980000000 |
| 510 | 220 | 0.335620000000 | 0.668040000000 | 0.403720000000 |
|     | 15  | 0.335630000000 | 0.668030000000 | 0.669440000000 |
|     | 15  | 0.023140000000 | 0.520390000000 | 0.537070000000 |
|     | 15  | 0.987290000000 | 0.509390000000 | 0.436900000000 |
|     | 8   | 0.060880000000 | 0.552350000000 | 0.575070000000 |
| 515 | 8   | 0.084860000000 | 0.422590000000 | 0.522130000000 |
|     | 8   | 0.069810000000 | 0.674210000000 | 0.518670000000 |
|     | 8   | 0.848500000000 | 0.426170000000 | 0.528820000000 |
|     | 8   | 0.933960000000 | 0.617780000000 | 0.449570000000 |
|     | 8   | 0.911870000000 | 0.351280000000 | 0.452200000000 |
| 520 | 8   | 0.416820000000 | 0.572820000000 | 0.445870000000 |
|     | 8   | 0.957630000000 | 0.491880000000 | 0.397160000000 |
|     | 8   | 0.341410000000 | 0.526600000000 | 0.658000000000 |
|     | 8   | 0.335640000000 | 0.668060000000 | 0.709860000000 |
|     | 220 | 0.476220000000 | 0.534070000000 | 0.835310000000 |
| 525 | 220 | 0.521410000000 | 0.471900000000 | 0.635000000000 |
|     | 220 | 0.475430000000 | 0.545520000000 | 0.728980000000 |
|     | 15  | 0.483240000000 | 0.503170000000 | 0.537070000000 |
|     | 15  | 0.494260000000 | 0.478340000000 | 0.436900000000 |
|     | 8   | 0.451280000000 | 0.508930000000 | 0.575070000000 |
| 530 | 8   | 0.581010000000 | 0.662680000000 | 0.522130000000 |
|     | 8   | 0.329420000000 | 0.396010000000 | 0.518670000000 |
|     | 8   | 0.577470000000 | 0.422770000000 | 0.528820000000 |
|     | 8   | 0.385860000000 | 0.316610000000 | 0.449570000000 |
|     | 8   | 0.652360000000 | 0.561020000000 | 0.452210000000 |
| 535 | 8   | 0.430840000000 | 0.844450000000 | 0.445870000000 |
|     | 8   | 0.511780000000 | 0.466190000000 | 0.397160000000 |
|     | 8   | 0.477040000000 | 0.815210000000 | 0.657980000000 |
|     | 220 | 0.469580000000 | 0.942580000000 | 0.835320000000 |
|     | 220 | 0.531760000000 | 0.049950000000 | 0.635000000000 |
| 540 | 220 | 0.458140000000 | 0.930360000000 | 0.728990000000 |
|     | 15  | 0.500460000000 | 0.980510000000 | 0.537070000000 |
|     | 15  | 0.525310000000 | 0.016360000000 | 0.436900000000 |
|     | 8   | 0.494680000000 | 0.942780000000 | 0.575060000000 |
|     | 8   | 0.340950000000 | 0.918790000000 | 0.522130000000 |
| 545 | 8   | 0.607620000000 | 0.933840000000 | 0.518660000000 |
|     | 8   | 0.580880000000 | 0.155150000000 | 0.528820000000 |
|     | 8   | 0.687040000000 | 0.069690000000 | 0.449570000000 |
|     | 8   | 0.442640000000 | 0.091790000000 | 0.452200000000 |
|     | 8   | 0.159210000000 | 0.586830000000 | 0.445870000000 |
| 550 | 8   | 0.537460000000 | 0.046020000000 | 0.397160000000 |
|     | 8   | 0.188420000000 | 0.662230000000 | 0.657990000000 |
|     | 220 | 0.469130000000 | 0.527920000000 | 0.337270000000 |
|     | 220 | 0.538500000000 | 0.486650000000 | 0.137110000000 |
|     | 220 | 0.484170000000 | 0.510750000000 | 0.233880000000 |
| 555 | 220 | 0.335640000000 | 0.668060000000 | 0.091260000000 |
|     | 220 | 0.335610000000 | 0.668020000000 | 0.903100000000 |
|     | 15  | 0.335630000000 | 0.668060000000 | 0.166540000000 |
|     | 15  | 0.500050000000 | 0.534850000000 | 0.037290000000 |
|     | 15  | 0.519360000000 | 0.498520000000 | 0.937270000000 |
| 560 | 8   | 0.502370000000 | 0.586720000000 | 0.075530000000 |
|     | 8   | 0.341040000000 | 0.452450000000 | 0.024240000000 |
|     | 8   | 0.618050000000 | 0.680620000000 | 0.017980000000 |
|     | 8   | 0.570440000000 | 0.428850000000 | 0.032510000000 |
|     | 8   | 0.678580000000 | 0.602460000000 | 0.952390000000 |
| 565 | 8   | 0.423710000000 | 0.342260000000 | 0.954310000000 |
|     | 8   | 0.156380000000 | 0.573790000000 | 0.944520000000 |
|     | 8   | 0.537930000000 | 0.475220000000 | 0.898850000000 |
|     | 8   | 0.202560000000 | 0.523590000000 | 0.148470000000 |
|     | 8   | 0.335710000000 | 0.668160000000 | 0.204190000000 |
| 570 | 220 | 0.062010000000 | 0.534520000000 | 0.337270000000 |
|     | 220 | 0.951350000000 | 0.465140000000 | 0.137120000000 |
|     | 220 | 0.029820000000 | 0.519490000000 | 0.233870000000 |
|     | 15  | 0.038020000000 | 0.503610000000 | 0.037300000000 |
|     | 15  | 0.982380000000 | 0.484260000000 | 0.937270000000 |
| 575 | 8   | 0.087580000000 | 0.501310000000 | 0.075530000000 |
|     | 8   | 0.114630000000 | 0.662620000000 | 0.024240000000 |
|     | 8   | 0.065800000000 | 0.385620000000 | 0.017990000000 |
|     | 8   | 0.861630000000 | 0.433220000000 | 0.032520000000 |



Supplementary Material (ESI) for Journal of Materials Chemistry  
This journal is © The Royal Society of Chemistry 2007

|     |     |                |                |                |
|-----|-----|----------------|----------------|----------------|
| 580 | 8   | 0.927140000000 | 0.325050000000 | 0.952390000000 |
|     | 8   | 0.921730000000 | 0.579870000000 | 0.954310000000 |
|     | 8   | 0.420630000000 | 0.847280000000 | 0.944520000000 |
|     | 8   | 0.940500000000 | 0.465650000000 | 0.898850000000 |
|     | 8   | 0.324220000000 | 0.801080000000 | 0.148440000000 |
| 585 | 220 | 0.475720000000 | 0.941640000000 | 0.337270000000 |
|     | 220 | 0.517010000000 | 0.052300000000 | 0.137120000000 |
|     | 220 | 0.492840000000 | 0.973720000000 | 0.233870000000 |
|     | 15  | 0.468800000000 | 0.965650000000 | 0.037290000000 |
|     | 15  | 0.505130000000 | 0.021290000000 | 0.937260000000 |
| 590 | 8   | 0.416930000000 | 0.916100000000 | 0.075530000000 |
|     | 8   | 0.551180000000 | 0.889010000000 | 0.024240000000 |
|     | 8   | 0.323030000000 | 0.937870000000 | 0.017980000000 |
|     | 8   | 0.574810000000 | 0.142020000000 | 0.032510000000 |
|     | 8   | 0.401180000000 | 0.076550000000 | 0.952380000000 |
| 595 | 8   | 0.661390000000 | 0.081900000000 | 0.954300000000 |
|     | 8   | 0.429870000000 | 0.583030000000 | 0.944520000000 |
|     | 8   | 0.528430000000 | 0.063170000000 | 0.898840000000 |
|     | 8   | 0.480050000000 | 0.679430000000 | 0.148450000000 |
|     | 220 | 0.394390000000 | 0.194090000000 | 0.501980000000 |
| 600 | 220 | 0.287030000000 | 0.148910000000 | 0.301670000000 |
|     | 220 | 0.406640000000 | 0.194890000000 | 0.395650000000 |
|     | 220 | 0.668950000000 | 0.334690000000 | 0.070390000000 |
|     | 15  | 0.668960000000 | 0.334690000000 | 0.336110000000 |
|     | 15  | 0.356470000000 | 0.187050000000 | 0.203740000000 |
| 605 | 15  | 0.320620000000 | 0.176040000000 | 0.103570000000 |
|     | 8   | 0.394210000000 | 0.219020000000 | 0.241730000000 |
|     | 8   | 0.418190000000 | 0.089260000000 | 0.188800000000 |
|     | 8   | 0.403140000000 | 0.340870000000 | 0.185330000000 |
|     | 8   | 0.181830000000 | 0.092830000000 | 0.195490000000 |
| 610 | 8   | 0.267280000000 | 0.284420000000 | 0.116240000000 |
|     | 8   | 0.245210000000 | 0.017930000000 | 0.118870000000 |
|     | 8   | 0.750150000000 | 0.239480000000 | 0.112540000000 |
|     | 8   | 0.290970000000 | 0.158540000000 | 0.063820000000 |
|     | 8   | 0.674750000000 | 0.193270000000 | 0.324670000000 |
| 615 | 8   | 0.668960000000 | 0.334710000000 | 0.376530000000 |
|     | 220 | 0.809550000000 | 0.200730000000 | 0.501980000000 |
|     | 220 | 0.854740000000 | 0.138560000000 | 0.301670000000 |
|     | 220 | 0.808760000000 | 0.212180000000 | 0.395650000000 |
|     | 15  | 0.816570000000 | 0.169830000000 | 0.203740000000 |
| 620 | 15  | 0.827620000000 | 0.145030000000 | 0.103570000000 |
|     | 8   | 0.784610000000 | 0.175590000000 | 0.241730000000 |
|     | 8   | 0.914330000000 | 0.329340000000 | 0.188800000000 |
|     | 8   | 0.662750000000 | 0.062660000000 | 0.185330000000 |
|     | 8   | 0.910810000000 | 0.089430000000 | 0.195480000000 |
| 625 | 8   | 0.719250000000 | 0.983300000000 | 0.116240000000 |
|     | 8   | 0.985730000000 | 0.227750000000 | 0.118870000000 |
|     | 8   | 0.764160000000 | 0.511110000000 | 0.112540000000 |
|     | 8   | 0.845130000000 | 0.132880000000 | 0.063820000000 |
|     | 8   | 0.810380000000 | 0.481880000000 | 0.324660000000 |
| 630 | 220 | 0.802920000000 | 0.609250000000 | 0.501990000000 |
|     | 220 | 0.865090000000 | 0.716610000000 | 0.301670000000 |
|     | 220 | 0.791470000000 | 0.597020000000 | 0.395650000000 |
|     | 15  | 0.833790000000 | 0.647170000000 | 0.203740000000 |
|     | 15  | 0.858630000000 | 0.683030000000 | 0.103570000000 |
| 635 | 8   | 0.828000000000 | 0.609430000000 | 0.241730000000 |
|     | 8   | 0.674290000000 | 0.585440000000 | 0.188790000000 |
|     | 8   | 0.940950000000 | 0.600500000000 | 0.185330000000 |
|     | 8   | 0.914210000000 | 0.821810000000 | 0.195480000000 |
|     | 8   | 0.020350000000 | 0.736380000000 | 0.116240000000 |
| 640 | 8   | 0.775920000000 | 0.758430000000 | 0.118870000000 |
|     | 8   | 0.492540000000 | 0.253490000000 | 0.112540000000 |
|     | 8   | 0.870780000000 | 0.712680000000 | 0.063820000000 |
|     | 8   | 0.521760000000 | 0.328900000000 | 0.324660000000 |
|     | 220 | 0.802470000000 | 0.194590000000 | 0.003930000000 |
| 645 | 220 | 0.871840000000 | 0.153320000000 | 0.803780000000 |
|     | 220 | 0.817530000000 | 0.177410000000 | 0.900550000000 |
|     | 220 | 0.668960000000 | 0.334730000000 | 0.757920000000 |
|     | 220 | 0.668950000000 | 0.334690000000 | 0.569760000000 |
|     | 15  | 0.668970000000 | 0.334730000000 | 0.833210000000 |
| 650 | 15  | 0.833380000000 | 0.201520000000 | 0.703960000000 |
|     | 15  | 0.852690000000 | 0.165190000000 | 0.603930000000 |
|     | 8   | 0.835710000000 | 0.253410000000 | 0.742190000000 |
|     | 8   | 0.674370000000 | 0.119130000000 | 0.690910000000 |

|        |                  |                   |                  |                |
|--------|------------------|-------------------|------------------|----------------|
| 8      | 0.951380000000   | 0.347290000000    | 0.684650000000   |                |
| 8      | 0.903760000000   | 0.095520000000    | 0.699180000000   |                |
| 655    | 8                | 0.011920000000    | 0.269130000000   | 0.619050000000 |
| 8      | 0.757050000000   | 0.008940000000    | 0.620970000000   |                |
| 8      | 0.489710000000   | 0.240460000000    | 0.611190000000   |                |
| 8      | 0.871270000000   | 0.141880000000    | 0.565510000000   |                |
| 8      | 0.535880000000   | 0.190230000000    | 0.815150000000   |                |
| 660    | 8                | 0.669060000000    | 0.334890000000   | 0.870860000000 |
| 220    | 0.395340000000   | 0.201190000000    | 0.003930000000   |                |
| 220    | 0.284680000000   | 0.131800000000    | 0.803780000000   |                |
| 220    | 0.363170000000   | 0.186170000000    | 0.900540000000   |                |
| 665    | 15               | 0.371370000000    | 0.170260000000   | 0.703970000000 |
| 15     | 0.315710000000   | 0.150940000000    | 0.603940000000   |                |
| 8      | 0.420900000000   | 0.167890000000    | 0.742200000000   |                |
| 8      | 0.448070000000   | 0.329280000000    | 0.690920000000   |                |
| 8      | 0.399100000000   | 0.052230000000    | 0.684650000000   |                |
| 670    | 8                | 0.195000000000    | 0.099930000000   | 0.699180000000 |
| 8      | 0.260460000000   | 0.991720000000    | 0.619060000000   |                |
| 8      | 0.255080000000   | 0.246560000000    | 0.620980000000   |                |
| 8      | 0.753960000000   | 0.513950000000    | 0.611180000000   |                |
| 8      | 0.273830000000   | 0.132340000000    | 0.565520000000   |                |
| 8      | 0.657540000000   | 0.467720000000    | 0.815100000000   |                |
| 675    | 220              | 0.809070000000    | 0.608300000000   | 0.003930000000 |
| 220    | 0.850330000000   | 0.718960000000    | 0.803780000000   |                |
| 220    | 0.826170000000   | 0.640380000000    | 0.900530000000   |                |
| 15     | 0.802140000000   | 0.632320000000    | 0.703960000000   |                |
| 15     | 0.838460000000   | 0.687950000000    | 0.603930000000   |                |
| 680    | 8                | 0.750260000000    | 0.582790000000   | 0.742190000000 |
| 8      | 0.884500000000   | 0.555680000000    | 0.690910000000   |                |
| 8      | 0.656370000000   | 0.604560000000    | 0.684650000000   |                |
| 8      | 0.908150000000   | 0.808700000000    | 0.699180000000   |                |
| 685    | 8                | 0.734510000000    | 0.743220000000   | 0.619050000000 |
| 8      | 0.994720000000   | 0.748570000000    | 0.620970000000   |                |
| 8      | 0.763200000000   | 0.249700000000    | 0.611190000000   |                |
| 8      | 0.861760000000   | 0.729840000000    | 0.565510000000   |                |
| 8      | 0.813380000000   | 0.346080000000    | 0.815110000000   |                |
| END    |                  |                   |                  |                |
| 690    | 8 3              |                   |                  |                |
| 0 0 3  | 2.0 1.           |                   |                  |                |
|        | 0.3220370000D+03 | 0.5923939339D-01  |                  |                |
|        | 0.4843080000D+02 | 0.3514999608D+00  |                  |                |
|        | 0.1042060000D+02 | 0.7076579210D+00  |                  |                |
| 695    | 0 1 2            | 6.0 1.            |                  |                |
|        | 0.7402940000D+01 | -0.4044535832D+00 | 0.2445861070D+00 |                |
|        | 0.1576200000D+01 | 0.1221561761D+01  | 0.8539553735D+00 |                |
| 0 1 1  | 0.0 1.           |                   |                  |                |
|        | 0.3736840000D+00 | 0.1000000000D+01  | 0.1000000000D+01 |                |
| 700    | 220 2            |                   |                  |                |
| HAYWSC |                  |                   |                  |                |
| 0 1 3  | 8. 1.            |                   |                  |                |
| 5.3568 | -1.4687          | -0.0794           |                  |                |
| 1.71   | -1.8752          | 0.2902            |                  |                |
| 705    | 1.0              | 3.4301            | 0.1427           |                |
| 0 1 1  | 2. 1.            |                   |                  |                |
| 0.500  | 1.0              | 1.0               |                  |                |
| 15 5   |                  |                   |                  |                |
| 0 0 3  | 2.0 1.           |                   |                  |                |
| 710    | 0.1054900000D+04 | 0.6554071355D-01  |                  |                |
|        | 0.1591950000D+03 | 0.3840360794D+00  |                  |                |
|        | 0.3453040000D+02 | 0.6745411394D+00  |                  |                |
| 0 1 3  | 8.0 1.           |                   |                  |                |
|        | 0.4428660000D+02 | -0.1021300535D+00 | 0.1108510025D+00 |                |
| 715    | 0.1010190000D+02 | 0.8159224271D-01  | 0.4564950104D+00 |                |
|        | 0.2739970000D+01 | 0.9697885076D+00  | 0.6069360139D+00 |                |
| 0 1 2  | 5.0 1.           |                   |                  |                |
|        | 0.1218650000D+01 | -0.3714960219D+00 | 0.9158231022D-01 |                |
|        | 0.3955460000D+00 | 0.1270993496D+01  | 0.9349241043D+00 |                |
| 720    | 0 1 1            | 0.0 1.            |                  |                |
|        | 0.1228110000D+00 | 0.1000000000D+01  | 0.1000000000D+01 |                |
| 0 3 1  | 0.0 1.           |                   |                  |                |
|        | 0.5500000000D+00 | 0.1000000000D+01  |                  |                |
| 99 0   |                  |                   |                  |                |
| 725    | END              |                   |                  |                |
| DFT    |                  |                   |                  |                |

730 B3LYP  
XLGRID  
END  
SCFDIR  
TOLINTEG  
6 6 6 6 14  
SHRINK  
1 1  
735 LEVSHIFT  
6 1  
FMIXING  
30  
END
